# Supplementary material
Source: PubMed Central journal article supplement (PMC9923612)
Supplement: PEDS_20152093SupplementaryData.pdf [file PEDS_20152093SupplementaryData.pdf]

# Supplemental Information

## APPENDIX 1 SURVEY QUESTIONS

1. Does a specialized team (eg, Sexualized Assault Nurse Examiners) conduct medical evaluations for children presenting to your emergency department with sexual abuse/assault?
  - a. Yes
  - b. No
  
2. What year was the specialized team initiated?
3. Does your emergency department have a specialized pathway or order set for children with suspected sexual abuse/assault?
  - a. Yes
  - b. No
  
4. What year was the clinical pathway initiated?
5. What time cutoff in hours does your emergency department use for pubertal patients presenting with sexual assault for the following: STI testing, chlamydia/gonorrhea prophylaxis, emergency contraception?
  - a. 24 hours or less
  - b. 48 hours or less
  - c. 72 hours or less
  - d. 96 hours or less
  - e. 120 hours or less
  - f. No time cutoff
  
6. Sometimes clinicians may forego STI testing in cases of acute sexual assault in pubertal children to avoid impacting future criminal proceedings. Does this practice occur at your hospital?
  - a. Yes
  - b. No
  - c. Sometimes
  
7. Some hospitals may provide adolescents with prescriptions for STI prophylaxes/emergency contraception following acute sexual assault rather than administering the medications in the emergency department. What is the general practice at your hospital for prescribing the following:

|                         | Administer During Visit | Provide Prescription | Both Practices Used |
|-------------------------|-------------------------|----------------------|---------------------|
| Chlamydia prophylaxis   |                         |                      |                     |
| Gonorrhea prophylaxis   |                         |                      |                     |
| Emergency contraception |                         |                      |                     |

## Appendix 2 PHIS CTC Codes for Testing and Prophylaxis

| Test Category           | CTC Code                                                                                                                                                                                                                                                                                                              |
|-------------------------|-----------------------------------------------------------------------------------------------------------------------------------------------------------------------------------------------------------------------------------------------------------------------------------------------------------------------|
| Test                    |                                                                                                                                                                                                                                                                                                                       |
| Pregnancy               | Pregnancy test (316110)                                                                                                                                                                                                                                                                                               |
| Chlamydia               | Any of the following:<br>Microbial identification nucleic acid probe with amplification (382052)<br>Microbial identification nucleic acid probe (382042)<br>Chlamydia culture (361231)<br>Chlamydia antigen (361234)<br>Chlamydia smear (361232)<br>Chlamydia antibody (361233)<br>Polymerase chain reaction (382050) |
| Gonorrhea               | Any of the following:<br><i>Neisseria gonorrhoea</i> culture (361220)<br>Microbial identification nucleic acid probe with amplification (382052)<br>Microbial identification nucleic acid probe (382042)<br>Polymerase chain reaction (382050)                                                                        |
| Trichomoniasis          | Any of the following:<br>Wet mount (300310)<br>Wet prep for parasites (363070)<br>Nucleic acid probe (382040)                                                                                                                                                                                                         |
| Prophylaxis             |                                                                                                                                                                                                                                                                                                                       |
| Emergency contraception | Any of the following:<br>Levonorgestrel (151153)<br>Contraceptives (151181)<br>Norgestrel (151163)<br>Conjugated estrogens (151103)<br>Estrogen-progestin combinations (151127)                                                                                                                                       |
| Chlamydia               | Any of the following:<br>Azithromycin (122421)<br>Doxycycline (123115)<br>Levofloxacin (123215)<br>Erythromycin (122401)                                                                                                                                                                                              |
| Gonorrhea               | Any of the following:<br>Ceftriaxone sodium (122231)<br>Cefotaxime sodium (122211)<br>Cefixime (122207)<br>Cefpodoxime (122217)<br>Cefuroxime (122177)<br>Ciprofloxacin (123201) if discharge year 2004–2007                                                                                                          |
| Trichomoniasis          | Metronidazole (124164)                                                                                                                                                                                                                                                                                                |

**Appendix 3** Validation of CTC Codes for Testing and Prophylaxis in Sexually Assaulted Adolescents at 4 Hospitals

| Indication                      | Sensitivity (95% CI) | Specificity (95% CI) | Positive Predictive Value (95% CI) | Negative Predictive Value (95% CI) |
|---------------------------------|----------------------|----------------------|------------------------------------|------------------------------------|
| <b>Pregnancy test</b>           |                      |                      |                                    |                                    |
| Hospital 1                      | 98.5 (95.6–99.7)     | 94.1 (71.3–99.9)     | 99.5 (97.1–100.0)                  | 84.2 (60.4–96.6)                   |
| Hospital 2                      | 78.4 (61.8–90.2)     | 71.4 (29.0–96.3)     | 93.5 (78.6–99.2)                   | 38.5 (13.9–68.4)                   |
| Hospital 3                      | 70.4 (49.8–96.2)     | 94.7 (74.0–99.9)     | 95.0 (75.1–99.9)                   | 69.2 (48.2–85.7)                   |
| Hospital 4                      | 100.0 (91.0–100.0)   | 100.0 (54.1–100.0)   | 100.0 (91.0–100.0)                 | 100.0 (54.1–100.0)                 |
| Total                           | 90.4 (88.3–92.3)     | 92.0 (87.4–95.4)     | 98.0 (96.8–98.9)                   | 69.0 (63.1–74.5)                   |
| <b>Chlamydia test</b>           |                      |                      |                                    |                                    |
| Hospital 1                      | 99.5 (97.5–100)      | 100.0 (81.5–100.0)   | 100.0 (98.3–100.0)                 | 94.7 (74.0–99.9)                   |
| Hospital 2                      | 95.0 (75.1–99.9)     | 100.0 (88.4–100.0)   | 100.0 (82.4–100.0)                 | 96.8 (83.3–99.9)                   |
| Hospital 3                      | 88.2 (63.6–98.5)     | 93.9 (79.8–99.3)     | 88.2 (63.6–98.5)                   | 93.9 (79.8–99.3)                   |
| Hospital 4                      | 100.0 (92.1–100.0)   | 100.0 (47.8–100.0)   | 100.0 (92.1–100.0)                 | 100.0 (47.8–100.0)                 |
| Total                           | 98.0 (96.8–98.9)     | 97.4 (95.2–98.7)     | 98.8 (97.7–99.4)                   | 95.8 (93.3–97.6)                   |
| <b>Gonorrhea test</b>           |                      |                      |                                    |                                    |
| Hospital 1                      | 99.5 (97.5–100.0)    | 100.0 (80.5–100.0)   | 100.0 (98.3–100.0)                 | 94.4 (72.7–99.9)                   |
| Hospital 2                      | 94.7 (74.0–99.9)     | 96.8 (83.3–99.9)     | 94.7 (74.0–99.9)                   | 96.8 (83.3–99.9)                   |
| Hospital 3                      | 94.1 (71.3–99.9)     | 93.9 (79.8–99.3)     | 88.9 (65.3–98.6)                   | 96.9 (83.8–99.9)                   |
| Hospital 4                      | 100.0 (92.1–100.0)   | 80.0 (28.4–99.5)     | 97.8 (88.5–99.9)                   | 100.0 (39.8–100.0)                 |
| Total                           | 98.6 (97.6–99.3)     | 93.7 (90.8–95.9)     | 97.1 (95.7–98.1)                   | 97.0 (94.7–98.5)                   |
| <b>Trichomoniasis test</b>      |                      |                      |                                    |                                    |
| Hospital 1                      | 100.0 (97.8–100.0)   | 97.7 (88.0–99.9)     | 99.4 (96.7–100.0)                  | 100.0 (91.8–100.0)                 |
| Hospital 2                      | —                    | —                    | —                                  | —                                  |
| Hospital 3                      | 100.0 (2.5–100.0)    | 97.8 (88.2–99.9)     | 50.0 (1.3–98.7)                    | 100.0 (92.0–100.0)                 |
| Hospital 4                      | —                    | —                    | —                                  | —                                  |
| Total                           | 65.8 (59.7–71.5)     | 99.3 (98.4–99.7)     | 96.6 (92.8–98.8)                   | 89.9 (87.7–91.8)                   |
| <b>Emergency contraception</b>  |                      |                      |                                    |                                    |
| Hospital 1                      | 96.3 (91.5–98.8)     | 100.0 (95.4–100.0)   | 100.0 (97.2–100.0)                 | 94.0 (86.5–98.0)                   |
| Hospital 2                      | 95.5 (77.2–99.9)     | 90.9 (70.8–98.9)     | 91.3 (72.0–98.9)                   | 95.2 (76.2–99.9)                   |
| Hospital 3                      | 88.0 (68.8–97.5)     | 76.2 (52.8–91.8)     | 81.5 (61.9–93.7)                   | 84.2 (60.4–96.6)                   |
| Hospital 4                      | 100.0 (87.7–100.0)   | 82.4 (56.6–96.2)     | 90.3 (74.2–98.0)                   | 100.0 (76.8–100.0)                 |
| Total                           | 96.0 (94.1–97.4)     | 86.1 (82.5–89.2)     | 90.6 (88.1–92.7)                   | 93.9 (91.1–96.0)                   |
| <b>Chlamydia treatment</b>      |                      |                      |                                    |                                    |
| Hospital 1                      | 98.9 (96.0–99.9)     | 100.0 (94.1–100.0)   | 100.0 (97.9–100.0)                 | 96.8 (89.0–99.6)                   |
| Hospital 2                      | 96.4 (81.7–99.9)     | 86.4 (65.1–97.1)     | 90.0 (73.5–97.9)                   | 95.0 (75.1–99.9)                   |
| Hospital 3                      | 100.0 (86.8–100.0)   | 87.5 (67.6–97.3)     | 89.7 (72.6–97.8)                   | 100.0 (83.9–100.0)                 |
| Hospital 4                      | 100.0 (89.4–100.0)   | 94.1 (71.3–99.9)     | 97.1 (84.7–99.9)                   | 100.0 (79.4–100.0)                 |
| Total                           | 99.1 (98.1–99.6)     | 91.2 (88.2–93.7)     | 95.0 (93.2–96.4)                   | 98.3 (96.5–99.3)                   |
| <b>Gonorrhea treatment</b>      |                      |                      |                                    |                                    |
| Hospital 1                      | 98.2 (95–99.6)       | 100.0 (94.7–100.0)   | 100.0 (97.8–100.0)                 | 95.8 (88.1–99.1)                   |
| Hospital 2                      | 96.0 (79.6–99.9)     | 88.0 (68.8–97.5)     | 88.9 (70.8–97.6)                   | 95.7 (78.1–99.9)                   |
| Hospital 3                      | 92.3 (74.9–99.1)     | 87.5 (67.6–97.3)     | 91.3 (72.0–98.9)                   | 91.3 (72.0–98.9)                   |
| Hospital 4                      | 80.6 (62.5–92.5)     | 94.7 (74.0–99.9)     | 96.2 (80.4–99.9)                   | 75.0 (53.3–90.2)                   |
| Total                           | 89.8 (87.3–91.9)     | 91.9 (89.1–94.2)     | 94.2 (82.8–88.9)                   | 86.1 (82.8–88.9)                   |
| <b>Trichomoniasis treatment</b> |                      |                      |                                    |                                    |
| Hospital 1                      | 97.7 (93.4–99.8)     | 98.8 (93.5–100.0)    | 99.2 (95.7–100.0)                  | 96.5 (90.0–99.3)                   |
| Hospital 2                      | 100.0 (83.9–100.0)   | 100.0 (85.2–100.0)   | 100.0 (83.9–100.0)                 | 100.0 (85.2–100.0)                 |
| Hospital 3                      | 100.0 (2.5–100.0)    | 95.6 (84.9–99.5)     | 33.3 (0.8–90.6)                    | 100.0 (91.8–100.0)                 |
| Hospital 4                      | 85.7 (42.1–99.6)     | 100.0 (90.7–100.0)   | 100.0 (54.1–100.0)                 | 97.4 (86.5–99.9)                   |
| Total                           | 96.0 (93.2–97.9)     | 98.6 (97.4–99.3)     | 96.3 (93.6–98.2)                   | 98.4 (97.3–99.2)                   |

Calculations were not performed for trichomoniasis testing at hospitals 2 and 4 because there were no true- or false- positives.

**Appendix 4** Association of Hospital-Level and Patient-Level Factors With Chlamydia Prophylaxis, Gonorrhea Prophylaxis, and Emergency Contraception

| Factor                | Chlamydia Prophylaxis |           | Gonorrhea Prophylaxis |           | Emergency Contraception |           |
|-----------------------|-----------------------|-----------|-----------------------|-----------|-------------------------|-----------|
|                       | OR                    | 95% CI    | OR                    | 95% CI    | OR                      | 95% CI    |
| <b>Hospital level</b> |                       |           |                       |           |                         |           |
| Pathway               | 1.60                  | 1.26–2.02 | 1.56                  | 1.20–2.03 | 1.47                    | 1.13–1.91 |
| Team                  | 0.70                  | 0.48–1.01 | 0.66                  | 0.47–0.94 | 0.78                    | 0.56–1.07 |
| <b>Region</b>         |                       |           |                       |           |                         |           |
| Midwest               | Referent              | Referent  | Referent              | Referent  | Referent                | Referent  |
| Northeast             | 1.02                  | 0.62–1.69 | 0.99                  | 0.62–1.57 | 1.20                    | 0.86–1.66 |
| South                 | 0.66                  | 0.47–0.92 | 0.68                  | 0.49–0.95 | 0.78                    | 0.55–1.09 |
| West                  | 0.57                  | 0.33–0.99 | 0.65                  | 0.39–1.08 | 0.88                    | 0.55–1.39 |
| <b>Patient level</b>  |                       |           |                       |           |                         |           |
| <b>Age, y</b>         |                       |           |                       |           |                         |           |
| 12                    | Referent              | Referent  | Referent              | Referent  | Referent                | Referent  |
| 13                    | 1.51                  | 1.35–1.68 | 1.49                  | 1.34–1.66 | 1.42                    | 1.28–1.58 |
| 14                    | 1.82                  | 1.49–2.22 | 1.79                  | 1.50–2.15 | 1.56                    | 1.29–1.89 |
| 15                    | 2.51                  | 1.94–3.24 | 2.38                  | 1.83–3.10 | 2.00                    | 1.51–2.64 |
| 16–18                 | 2.41                  | 1.89–3.09 | 2.24                  | 1.76–2.86 | 1.73                    | 1.34–2.24 |
| <b>Gender</b>         |                       |           |                       |           |                         |           |
| Male                  | Referent              | Referent  | Referent              | Referent  | –                       | –         |
| Female                | 3.82                  | 3.08–4.73 | 3.77                  | 3.03–4.69 | –                       | –         |
| <b>Race/ethnicity</b> |                       |           |                       |           |                         |           |
| Non-Hispanic white    | Referent              | Referent  | Referent              | Referent  | Referent                | Referent  |
| Non-Hispanic black    | 1.09                  | 0.91–1.30 | 1.13                  | 0.95–1.35 | 1.04                    | 0.89–1.23 |
| Hispanic              | 0.68                  | 0.46–1.00 | 0.68                  | 0.45–1.00 | 0.70                    | 0.48–1.03 |
| Other                 | 1.01                  | 0.83–1.22 | 1.03                  | 0.86–1.22 | 1.03                    | 0.84–1.25 |
| <b>Insurance</b>      |                       |           |                       |           |                         |           |
| Private               | Referent              | Referent  | Referent              | Referent  | Referent                | Referent  |
| Public                | 1.00                  | 0.87–1.15 | 1.01                  | 0.87–1.16 | 0.98                    | 0.83–1.15 |
| Uninsured             | 1.15                  | 0.84–1.56 | 1.14                  | 0.85–1.53 | 1.19                    | 0.84–1.69 |
| Other                 | 0.98                  | 0.69–1.41 | 1.02                  | 0.71–1.48 | 0.88                    | 0.59–1.30 |
| Discharge year        | 1.10                  | 1.03–1.17 | 1.09                  | 1.02–1.16 | 1.07                    | 1.01–1.14 |

Results generated from logistic regression models accounting for clustering by hospital. Emergency contraception model included female patients only. The year the patient was discharged from the ED (2004 to 2013) was included as a continuous variable.
